# Supplementary material for: Thermomechanical relaxation and different water states in cottonseed protein derived bioplastics
Source: Royal Society of Chemistry journal article supplement (doi:10.1039/c4ra01794c), 2014-07-17
Supplement: c4ra01794c1.pdf [file c4ra01794c1.pdf]

## Electronic Supporting Information (ESI)

# Thermomechanical relaxation and different water states in cottonseed protein derived bioplastics

H.-B. Yue<sup>a, b, c \*</sup>, J. P. Fernandez-Blazquez<sup>b</sup>, P. S. Shuttleworth<sup>d\*</sup>, Y.-D. Cui<sup>a</sup>, G. Ellis<sup>d</sup>

<sup>a</sup> State Key Laboratory of Solidification Processing, School of Materials Science and Engineering, Northwestern Polytechnical University, Xi'an, Shaanxi 710072, China

<sup>b</sup> IMDEA Materials Institute, c/Eric Kandel 2, Getafe 28906, Madrid, Spain

<sup>c</sup> E.T.S.I. Industriales, Universidad Politécnica de Madrid, c/José Gutiérrez Abascal 2, 28006 Madrid, Spain

<sup>d</sup> Department of Polymer Physics, Elastomers and Energy, Institute of Polymer Science and Technology (ICTP-CSIC), Juan de la Cierva 3, 28006 Madrid, Spain

Corresponding authors: hangbo.yue@imdea.org (H. Yue); peter@ictp.csic.es (P. Shuttleworth)

## Content

**Table S1** Enthalpy of ice-melting and water vaporisation of the cross-linked CPBs

**Table S2** DSC results related to the bioplastics with different water content

**Fig. S1** Plots of the melting temperature ( $T_m$ ) of water in the CPBs networks versus different water content.

**Fig. S2** Infrared spectra recorded from different positions of samples (a) CP-FA, (b) CP-GX and (c) CP-GA. Spectrum of (d) water and (e) CPL-0CL are shown for comparison.

**Fig. S3** Plot of the intensity of the aldehyde C=O band at  $1697\text{ cm}^{-1}$  vs the intensity observed at  $3450\text{ cm}^{-1}$ , reflecting the relative concentration of water.

**Scheme S1** Cross-linking reactions of protein molecules with different aldehydes

## References

**Table S1** Enthalpy of ice-melting and water vaporisation of the cross-linked CPBs after water absorption for 30 min and 2h

| Samples                            | Pure  | CP-0CL- | CP-0CL | CP-FA-  | CP-FA- | CP-GX-  | CP-GX- | CP-GA-  | CP-GA- |
|------------------------------------|-------|---------|--------|---------|--------|---------|--------|---------|--------|
|                                    | Water | WA30min | - WA2h | WA30min | WA2h   | WA30min | WA2h   | WA30min | WA2h   |
| $\Delta H_m$<br>(J/g) <sup>a</sup> | 333.5 | 942     | 363    | 783     | 1029   | 560     | 592    | 336     | 435    |
| $\Delta H_v$<br>(J/g) <sup>b</sup> | 2260  | 8910    | 3567   | 7924    | 10431  | 5704    | 5849   | 3645    | 4420   |
| $\Delta H_v/\Delta H_m$            | 6.7   | 9.4     | 9.8    | 10.1    | 10.1   | 10.1    | 9.8    | 10.8    | 10.1   |

<sup>a</sup> Enthalpy of ice-melting, normalized with water mass; <sup>b</sup> Enthalpy of water vaporisation, normalized with water mass; WA: water absorption

Enthalpy of ice-melting ( $\Delta H_m$ ), normalized with the mass of water (absorbed), is obtained from Equation S1.

$$\Delta H_m = \frac{\Delta H_{W_{CPBs}} \times W_{CPBs}}{W_{H_2O}^{abs}} \quad (S1)$$

where  $\Delta H_{W_{CPBs}}$  is calculated by integrating the ice-melting endothermic peak, related to the total mass of the tested sample ( $W_{CPBs}$ );  $W_{H_2O}^{abs}$  is the weight of water adsorbed onto the CPBs bioplastic. Enthalpy of water vaporization ( $\Delta H_v$ ), shown in Table S1, is calculated using the same concept.



**Table S2 (A)** DSC results related to the CP-0CL bioplastics with different water content

| Samples                                             | WC8  | WC16  | WC28 | WC34 | WC52  | WC53  | WC66  |
|-----------------------------------------------------|------|-------|------|------|-------|-------|-------|
| $\omega_{\text{H}_2\text{O}}$ (%)                   | 8    | 16    | 28   | 34   | 52    | 53    | 66    |
| Peak temp. (°C)                                     | --   | -12.9 | -5.3 | -3   | -0.5  | -0.1  | 1.9   |
| $\Delta H$ (J/g)                                    | --   | 24.5  | 53.7 | 75.5 | 143.1 | 145.9 | 210.4 |
| $W_{\text{H}_2\text{O}}^{\text{free}}$ (mg)         | 0    | 0.27  | 0.85 | 1.49 | 3.00  | 3.54  | 8.01  |
| Water added (mg)                                    | 0.47 | 0.67  | 1.68 | 2.50 | 4.00  | 4.70  | 9.24  |
| $W_{\text{H}_2\text{O}}^{\text{non-free}}$ (mg)     | 0.47 | 0.40  | 0.83 | 1.01 | 1.00  | 1.16  | 1.23  |
| $\omega_{\text{H}_2\text{O}}^{\text{free}}$ (%)     | 0    | 40    | 51   | 59   | 75    | 75    | 87    |
| $\omega_{\text{H}_2\text{O}}^{\text{non-free}}$ (%) | 100  | 60    | 49   | 41   | 25    | 25    | 13    |

Symbol notes: water content,  $\omega_{\text{H}_2\text{O}}$ ; melting enthalpy,  $\Delta H$ ; weigh of free water,  $W_{\text{H}_2\text{O}}^{\text{free}}$ ; weight of non-freezable water,  $W_{\text{H}_2\text{O}}^{\text{non-free}}$ ; weight percentage of free water  $\omega_{\text{H}_2\text{O}}^{\text{free}}$ ; weight percentage of non-free water  $\omega_{\text{H}_2\text{O}}^{\text{non-free}}$ . WC: water content.

**Table S2 (B)** DSC results related to the CP-FA bioplastics with different water content

| Samples                                             | WC8  | WC16  | WC28 | WC34 | WC52  | WC53  | WC66  |
|-----------------------------------------------------|------|-------|------|------|-------|-------|-------|
| $\omega_{\text{H}_2\text{O}}$ (%)                   | 8    | 16    | 28   | 34   | 52    | 53    | 66    |
| Peak temp. (°C)                                     | --   | -12.9 | -5.3 | -3   | -0.5  | -0.1  | 1.9   |
| $\Delta H$ (J/g)                                    | --   | 24.5  | 53.7 | 75.5 | 143.1 | 145.9 | 210.4 |
| $W_{\text{H}_2\text{O}}^{\text{free}}$ (mg)         | 0    | 0.23  | 1.18 | 2.14 | 4.93  | 7.84  | 11.07 |
| Water added (mg)                                    | 0.66 | 1.50  | 2.30 | 3.34 | 6.86  | 10.37 | 13.48 |
| $W_{\text{H}_2\text{O}}^{\text{non-free}}$ (mg)     | 0.66 | 1.27  | 1.12 | 1.20 | 1.93  | 2.53  | 2.41  |
| $\omega_{\text{H}_2\text{O}}^{\text{free}}$ (%)     | 0    | 16    | 52   | 64   | 72    | 76    | 82    |
| $\omega_{\text{H}_2\text{O}}^{\text{non-free}}$ (%) | 100  | 84    | 48   | 36   | 28    | 24    | 18    |

Symbol notes: water content,  $\omega_{\text{H}_2\text{O}}$ ; melting enthalpy,  $\Delta H$ ; weigh of free water,  $W_{\text{H}_2\text{O}}^{\text{free}}$ ; weight of non-freezable water,  $W_{\text{H}_2\text{O}}^{\text{non-free}}$ ; weight percentage of free water  $\omega_{\text{H}_2\text{O}}^{\text{free}}$ ; weight percentage of non-free water  $\omega_{\text{H}_2\text{O}}^{\text{non-free}}$ . WC: water content.

**Table S2 (C)** DSC results related to the CP-GX bioplastics with different water content

| Samples                                             | WC8  | WC16  | WC28 | WC34 | WC52  | WC53  | WC66  |
|-----------------------------------------------------|------|-------|------|------|-------|-------|-------|
| $\omega_{\text{H}_2\text{O}}$ (%)                   | 8    | 16    | 28   | 34   | 52    | 53    | 66    |
| Peak temp. (°C)                                     | --   | -12.9 | -5.3 | -3   | -0.5  | -0.1  | 1.9   |
| $\Delta H$ (J/g)                                    | --   | 24.5  | 53.7 | 75.5 | 143.1 | 145.9 | 210.4 |
| $W_{\text{H}_2\text{O}}^{\text{free}}$ (mg)         | 0    | 0.58  | 1.23 | 2.70 | 4.45  | 8.11  | 11.50 |
| Water added (mg)                                    | 0.81 | 1.34  | 2.28 | 3.87 | 6.33  | 10.02 | 13.57 |
| $W_{\text{H}_2\text{O}}^{\text{non-free}}$ (mg)     | 0.81 | 0.76  | 1.05 | 1.17 | 1.88  | 1.91  | 2.07  |
| $\omega_{\text{H}_2\text{O}}^{\text{free}}$ (%)     | 0    | 43    | 54   | 70   | 70    | 81    | 85    |
| $\omega_{\text{H}_2\text{O}}^{\text{non-free}}$ (%) | 100  | 57    | 46   | 30   | 30    | 19    | 15    |

Symbol notes: water content,  $\omega_{\text{H}_2\text{O}}$ ; melting enthalpy,  $\Delta H$ ; weigh of free water,  $W_{\text{H}_2\text{O}}^{\text{free}}$ ; weight of non-freezable water,  $W_{\text{H}_2\text{O}}^{\text{non-free}}$ ; weight percentage of free water  $\omega_{\text{H}_2\text{O}}^{\text{free}}$ ; weight percentage of non-free water  $\omega_{\text{H}_2\text{O}}^{\text{non-free}}$ . WC: water content.

**Table S2 (D)** DSC results related to the CP-GA bioplastics with different water content

| Samples                                             | WC8  | WC16  | WC28 | WC34 | WC52  | WC53  | WC66  |
|-----------------------------------------------------|------|-------|------|------|-------|-------|-------|
| $\omega_{\text{H}_2\text{O}}$ (%)                   | 8    | 16    | 28   | 34   | 52    | 53    | 66    |
| Peak temp. (°C)                                     | --   | -12.9 | -5.3 | -3   | -0.5  | -0.1  | 1.9   |
| $\Delta H$ (J/g)                                    | --   | 24.5  | 53.7 | 75.5 | 143.1 | 145.9 | 210.4 |
| $W_{\text{H}_2\text{O}}^{\text{free}}$ (mg)         | 0.26 | 0.72  | 0.83 | 1.48 | 3.15  | 5.06  | 10.97 |
| Water added (mg)                                    | 1.00 | 1.73  | 1.73 | 2.31 | 4.54  | 6.75  | 13.34 |
| $W_{\text{H}_2\text{O}}^{\text{non-free}}$ (mg)     | 0.74 | 1.01  | 0.90 | 0.83 | 1.39  | 1.69  | 2.37  |
| $\omega_{\text{H}_2\text{O}}^{\text{free}}$ (%)     | 26   | 42    | 48   | 64   | 69    | 75    | 82    |
| $\omega_{\text{H}_2\text{O}}^{\text{non-free}}$ (%) | 74   | 58    | 52   | 36   | 31    | 25    | 18    |

Symbol notes: water content,  $\omega_{\text{H}_2\text{O}}$ ; melting enthalpy,  $\Delta H$ ; weigh of free water,  $W_{\text{H}_2\text{O}}^{\text{free}}$ ; weight of non-freezable water,  $W_{\text{H}_2\text{O}}^{\text{non-free}}$ ; weight percentage of free water  $\omega_{\text{H}_2\text{O}}^{\text{free}}$ ; weight percentage of non-free water  $\omega_{\text{H}_2\text{O}}^{\text{non-free}}$ . WC: water content.

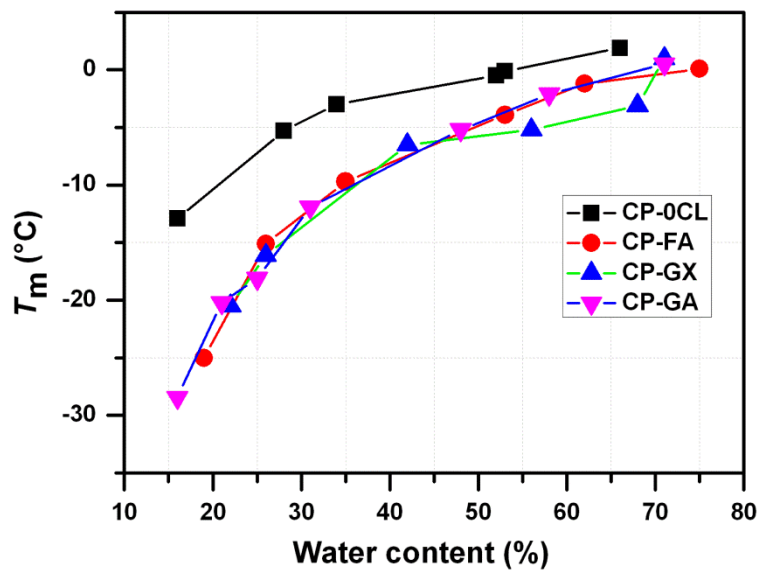

**Fig. S1** Plots of the melting temperature ( $T_m$ ) of water in the CPBs networks versus different water content.



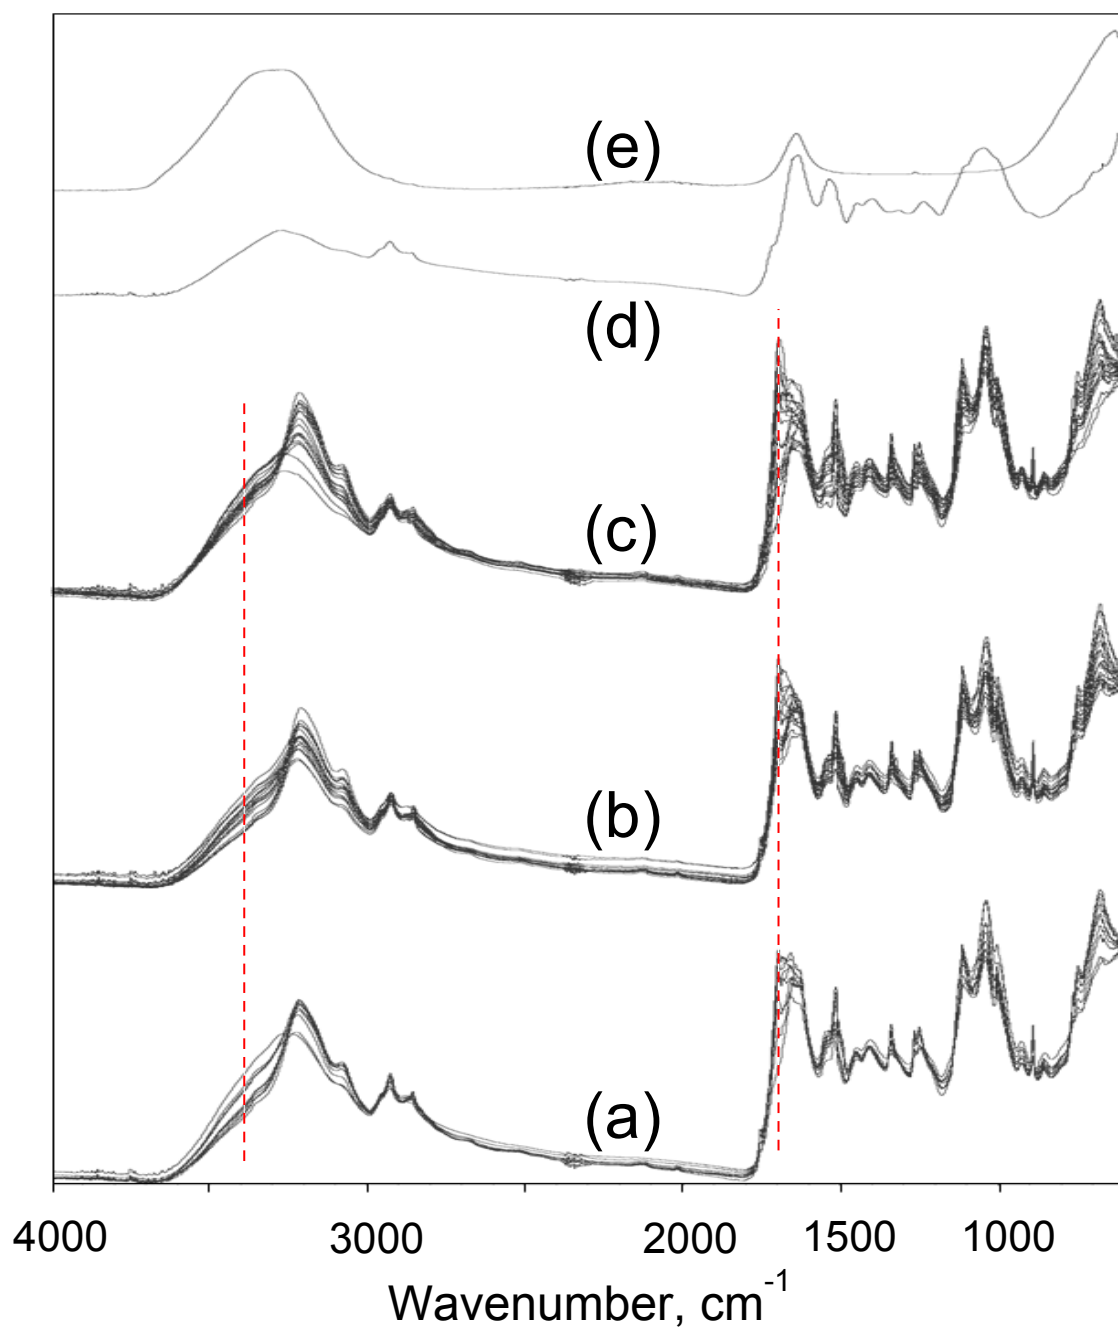

**Fig. S2** Infrared spectra recorded from different positions of samples (a) CP-FA, (b) CP-GX and (c) CP-GA. Spectrum of (d) water and (e) CPL-0CL are shown for comparison.

Figure S2 shows infrared spectra recorded from various positions on the different samples using an ATR objective with a Ge crystal with a contact surface of 100  $\mu\text{m}$  diameter. It can be observed that for each cross-linked sample heterogeneity is

observed, notably reflected in the relative intensity of the band at  $1697\text{ cm}^{-1}$  associated with unreacted or partially reacted aldehyde carbonyl stretching vibration (marked). Along with other band changes, it is also interesting to note the variations in the N-H and O-H stretching region. In this latter region, if we compare the intensity observed for the  $1697\text{ cm}^{-1}$  band with that of the OH region (marked), we observe that an inverse correlation exists (see Figure S3), which provides evidence for a heterogeneous water uptake in the system, being lower when more aldehyde is present. Although this was a generalised observation the best correlations were observed for the spectra from CP-FA and CP-GX (shown).

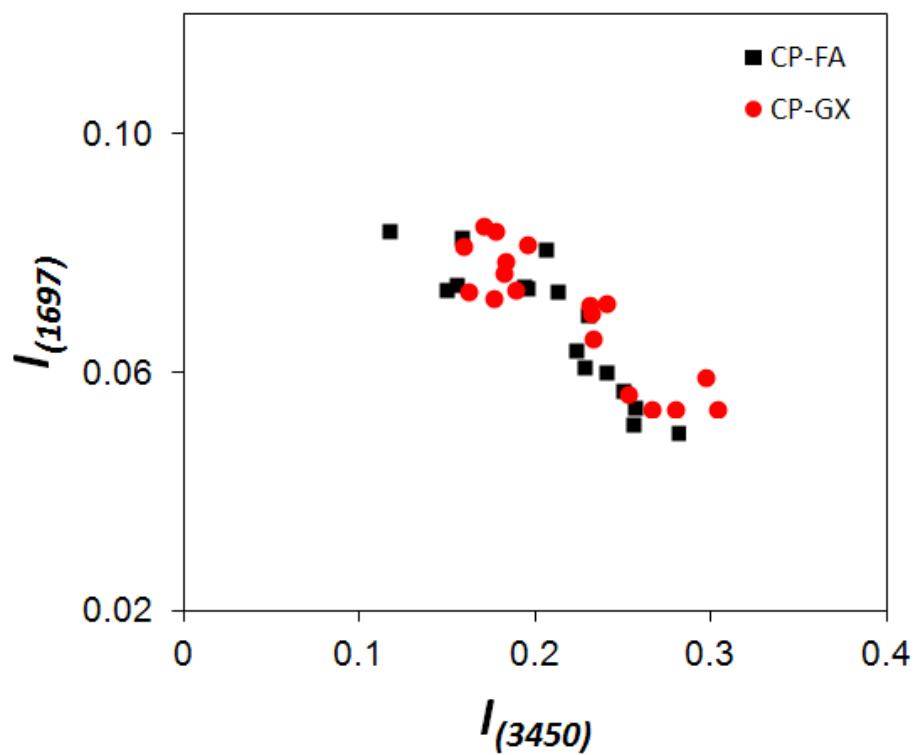

**Fig. S3** Plot of the intensity of the aldehyde C=O band at 1697 cm<sup>-1</sup> vs the intensity observed at 3450 cm<sup>-1</sup>, reflecting the relative concentration of water.



imine covalent bond formation<sup>1,2</sup>. Glyoxal maintains the same mechanism as GA.

### References

1. J. A. Kiernan, *Microscopy Today*, 2000, **1**, 8-12.
2. H. B. Yue, Y. D. Cui, P. S. Shuttleworth and J. H. Clark, *Green Chem*, 2012, **14**, 2009-2016.
